# Supplementary material for: Increasing n-butanol production with Saccharomyces cerevisiae by optimizing acetyl-CoA synthesis, NADH levels and trans-2-enoyl-CoA reductase expression
Source: PubMed Central journal article supplement (PMC5123364; doi:10.1186/s13068-016-0673-0), 2016-11-25
Supplement: 13068_2016_673_MOESM1_ESM.pdf [file 13068_2016_673_MOESM1_ESM.pdf]

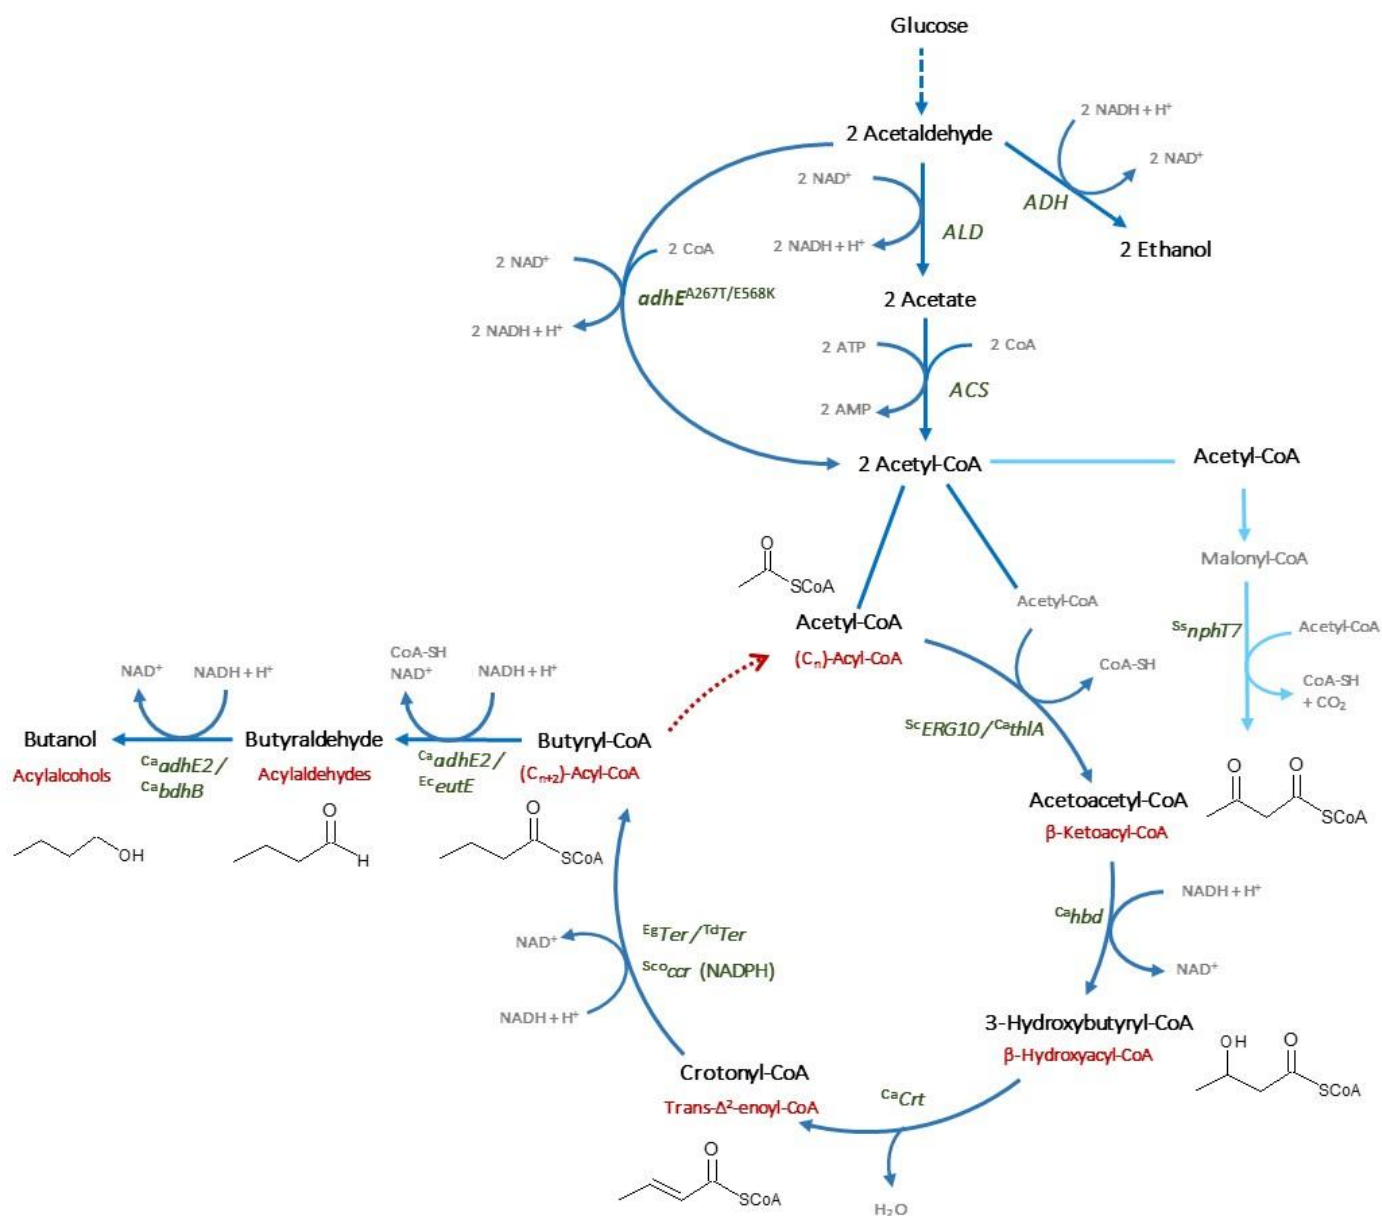

**Figure S1: Metabolic pathway for n-butanol production via reverse  $\beta$ -oxidation in yeast.**

n-Butanol production and reverse  $\beta$ -oxidation are shown as a process of one or several rotations, respectively, of an acetoacetyl-CoA derived synthesis pathway. This pathway can generate various compounds with different chain lengths. The different isoenzymes, tested in the former study [1], are shown for each reaction. The reaction of *S<sup>n</sup>phT7* (use of malonyl-CoA and acetyl-CoA for production of acetoacetyl-CoA) is shown in light blue [1].

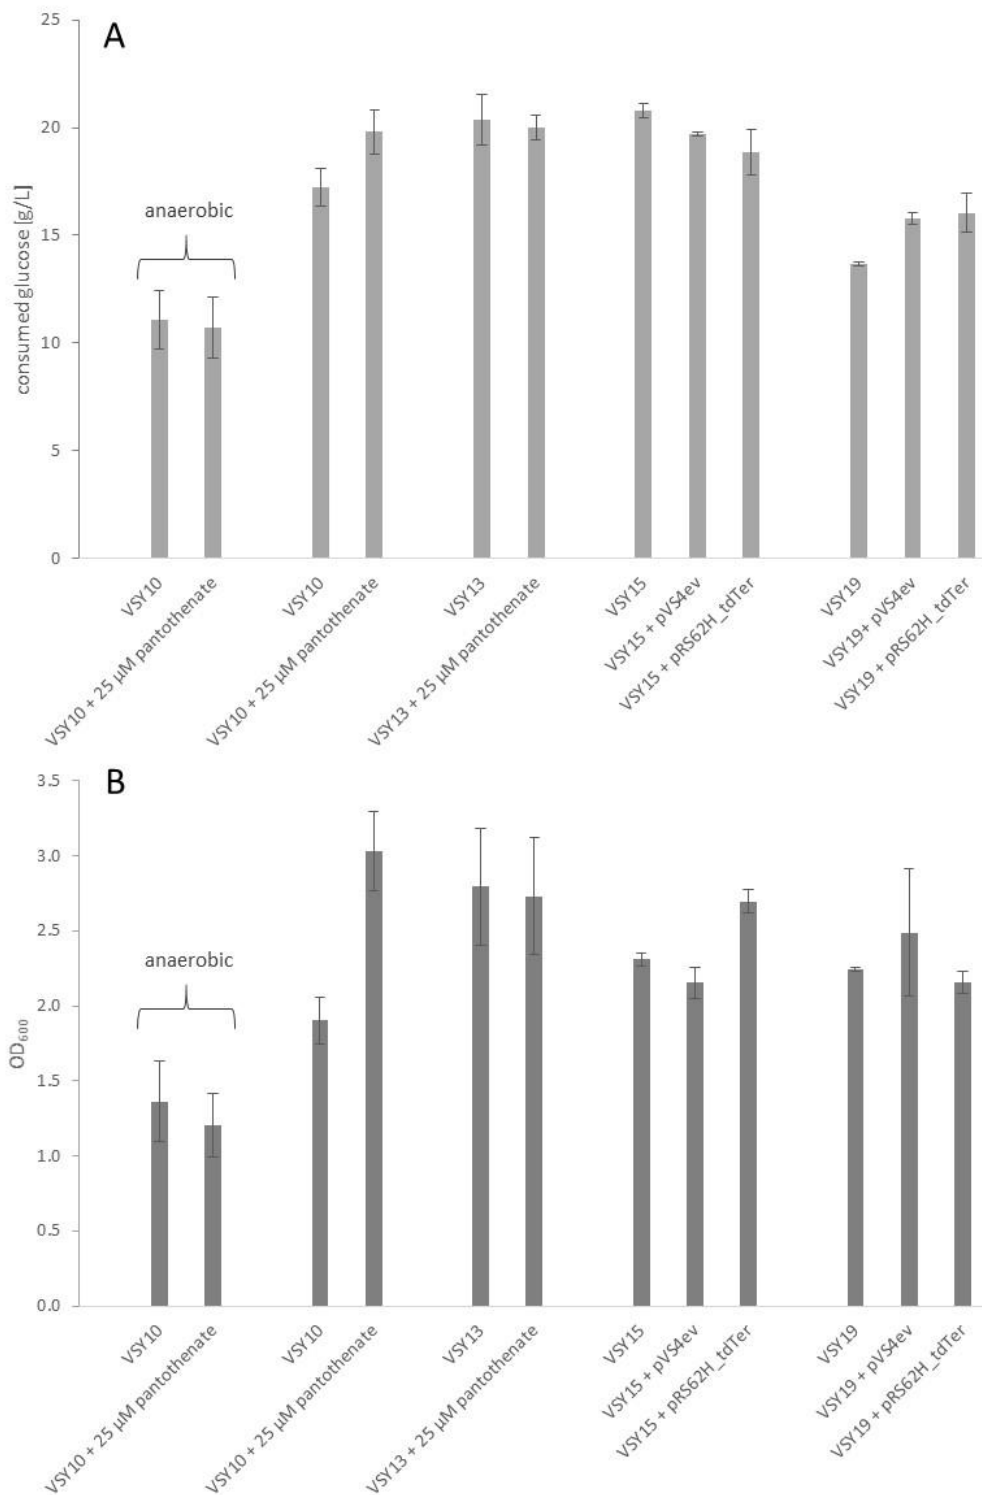

**Figure S2: Comparison of glucose consumption and final OD<sub>600</sub> of n-butanol production strains.**

**A** Consumed glucose after 171 h of fermentation started with 20 g/L glucose in SMD medium. **B** The OD<sub>600</sub> after 171 h of fermentations started with an OD<sub>600</sub> of 0.3 in SMD medium.

Compared are fermentations of VSY10 ( $\Delta adh1-6 sfa1 gpd2$  with n-butanol pathway genes, *coaA* and *adhE*<sup>A267T/E568K</sup>) anaerobically and aerobically, VSY13 (like VSY10, but *adhE*<sup>A267T/E568K/R577S</sup> instead of *adhE*<sup>A267T/E568K</sup>), VSY15 (VSY13 with pADH1\_FMS1) and VSY19 (VSY15 with  $\Delta ald6$ ) with or without addition of 25  $\mu$ M pantothenate or *adhE*<sup>A267T/E568K/R577S</sup> (pVS4ev) or pRS62H\_tdTer overexpression. Error bars represent the standard deviation of three independent replicates.

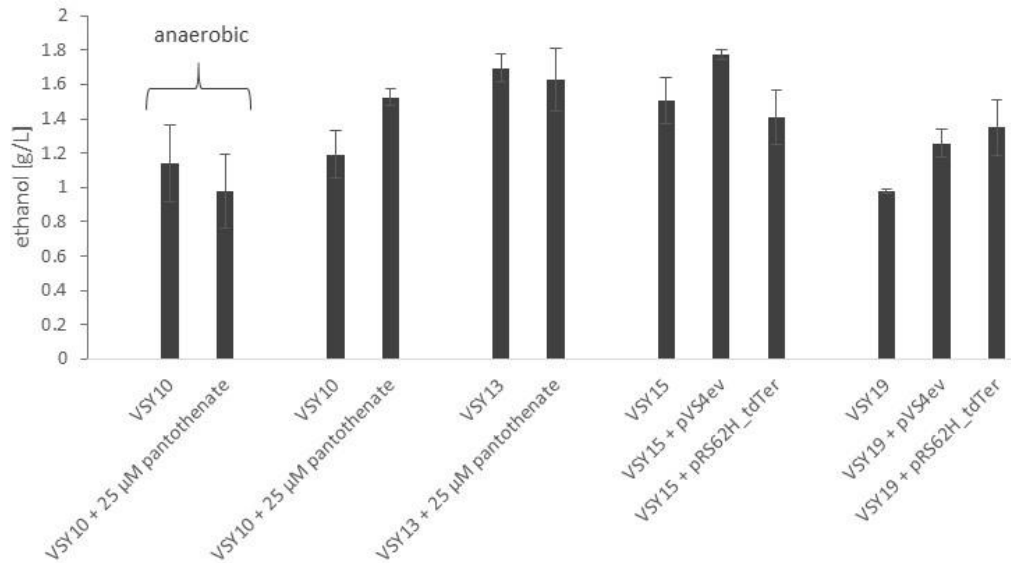

**Figure S3: Comparison of ethanol concentration of n-butanol production strains.**

The ethanol concentration after 171 h of fermentations started with an  $OD_{600}$  of 0.3 in SMD medium is shown. Compared are fermentations of VSY10 ( $\Delta adh1-6$  *sfa1* *gpd2* with n-butanol pathway genes, *coaA* and *adhE*<sup>A267T/E568K</sup>) anaerobically and aerobically, VSY13 (like VSY10, but *adhE*<sup>A267T/E568K/R577S</sup> instead of *adhE*<sup>A267T/E568K</sup>), VSY15 (VSY13 with *pADH1\_FMS1*) and VSY19 (VSY15 with  $\Delta ald6$ ) with or without addition of 25  $\mu$ M pantothenate or *adhE*<sup>A267T/E568K/R577S</sup> (*pVS4ev*) or *pRS62H\_tdTer* overexpression. Error bars represent the standard deviation of three independent replicates.

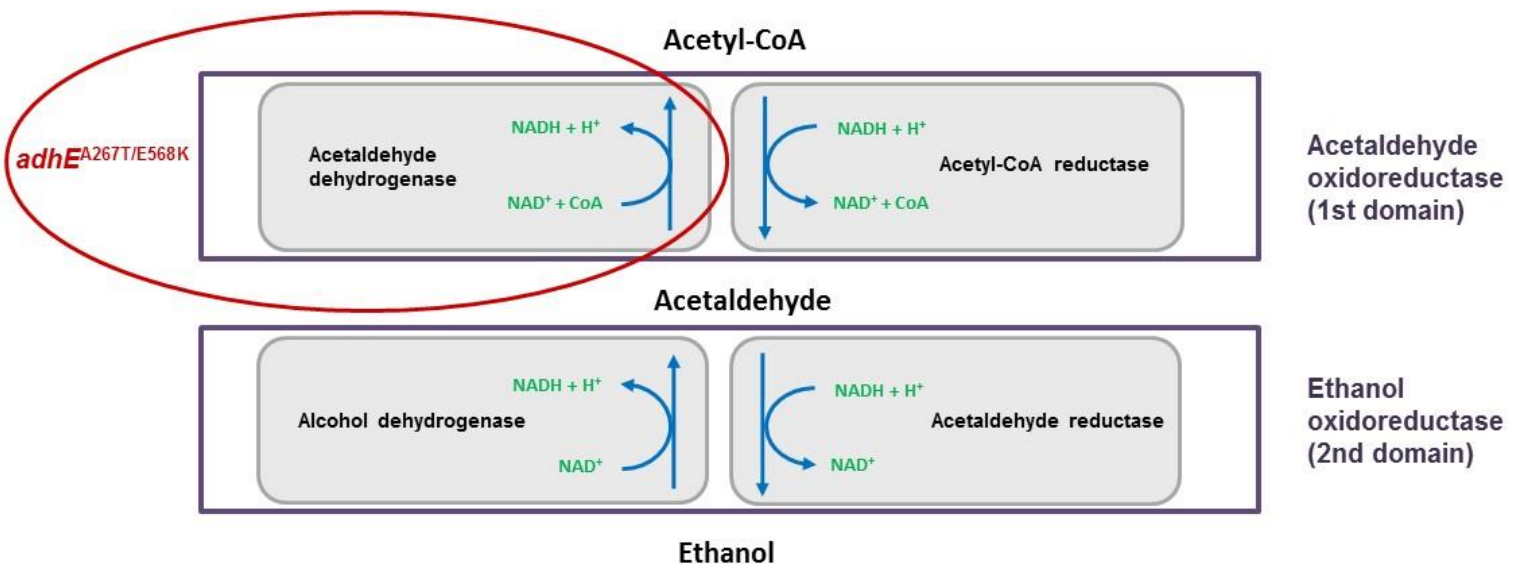

**Figure S4: Enzymatic reactions of adhE from *E. coli***

Shown are possible reaction steps of multifunctional oxidoreductase adhE. With the wild type enzyme reduction from acetyl-CoA into acetaldehyde into ethanol takes place, but with amino acid changes A267T and E568K, adhE preferably converts acetaldehyde into acetyl-CoA [2].

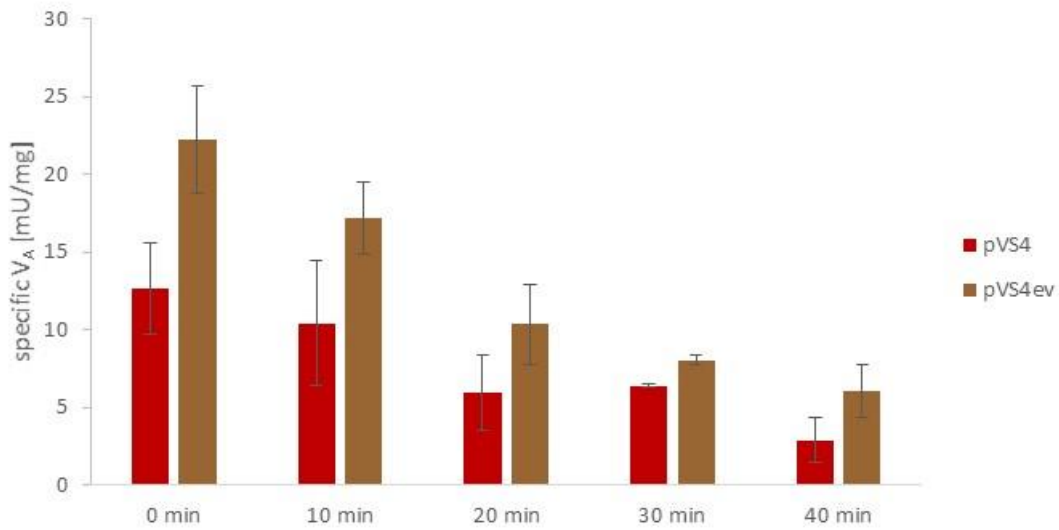

**Figure S5: Stability assay of adhE<sup>A267T/E568K/R577S</sup>.**

Dehydrogenase activity of acetylating acetaldehyde dehydrogenase *adhE*<sup>A267T/E568K</sup> (pVS4) and *adhE*<sup>A267T/E568K/R577S</sup> (pVS4ev) was measured directly after incubation of cell extract for 0 to 40 min at 30° (based on [2]). One unit (U) is defined as the conversion of 1 μmol of substrate into the corresponding product per 1 min. The mean values of three independent replicates are shown with standard deviations.

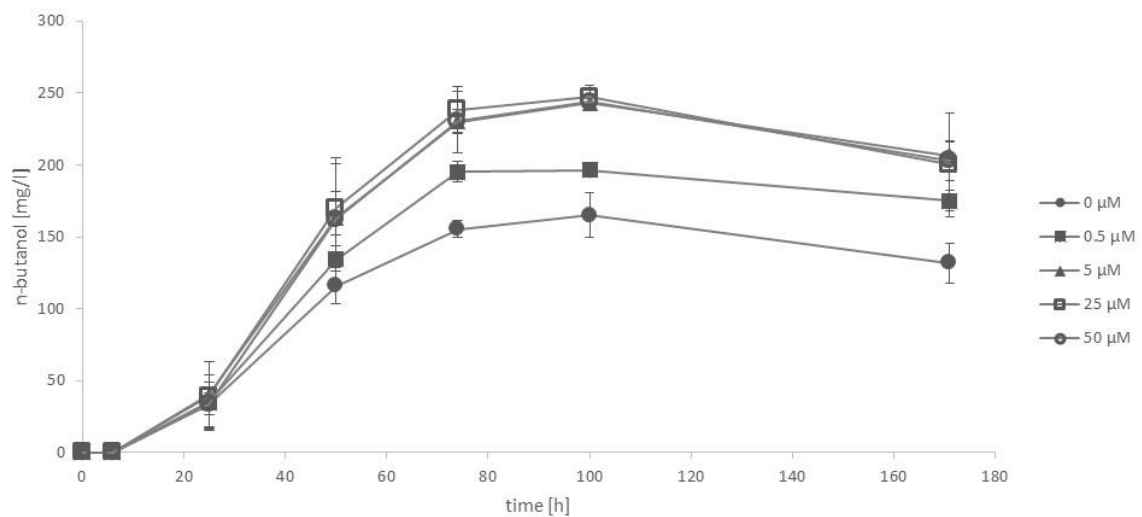

**Figure S6: n-Butanol production of VSY13 under aerobic conditions with addition of pantothenate.**

Five different concentrations of pantothenate were added to SMD medium: 0 μM (circle), 0.5 μM (square), 5 μM (triangle), 25 μM (open square), 50 μM (open circle). Error bars represent the standard deviation of three independent replicates.

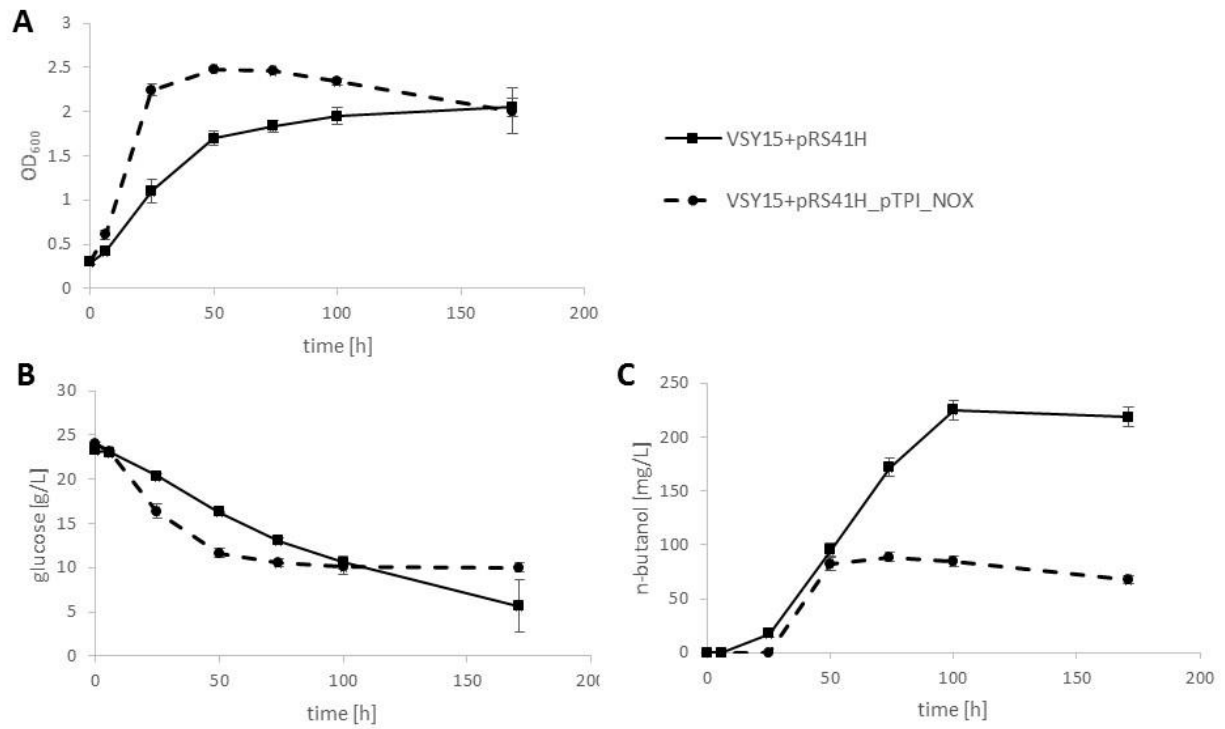

**Figure S7: Aerobic fermentation of VSY15 containing NADH oxidase nox from *Streptococcus pneumoniae*.**

Shown are values of OD<sub>600</sub> (A), glucose (B) and n-butanol (C) concentration of fermentations in SMD media with VSY15 ( $\Delta adh1-6$  *sfa1* *gpd2*, n-butanol pathway genes, *coaA* and *adhE*<sup>A267T/E568K/R577S</sup>, pADH1\_ *FMS1*) with pRS41H\_pTPI\_NOX (dashed line) or empty vector pRS41H as a control (solid line).

**Table S1: Relevant primers for this study**

The abbreviations within the primer names were used as follows: forward primer (fw), reverse primer (rev), overlap (ov). Other primers for construction of all strains and plasmids are available in [2].

| Primer name                  | Sequence 5'-3'                                                                         | Description                                                       |
|------------------------------|----------------------------------------------------------------------------------------|-------------------------------------------------------------------|
| vsp329_pVS4-Kass_ovtACS2_rev | ATTACGAAATTTTTCTCATTTAAGGAAAAATATAAG<br>GATGAGAAAGTGAAATCGG                            | fusion-PCR for <i>adhE</i><br>A267T/E568K/R577S<br>in <i>ACS2</i> |
| vsp330_pVS4-Kass_ovpACS2_fw  | AGAATACAGGAAAGTAAATCAATACAATAATAAAA<br>TCAGGCCTAGGCGACAACCC                            | fusion-PCR for <i>adhE</i><br>A267T/E568K/R577S<br>in <i>ACS2</i> |
| vsp331_pACS2_ovpVS4-Kass_rev | GGGTTGTGCGCTAGGCCTGATTTTATTATTGTATTG<br>ATTTACTTTCC                                    | fusion-PCR for <i>adhE</i><br>A267T/E568K/R577S<br>in <i>ACS2</i> |
| vsp332_tACS2_ovpVS4-Kass_fw  | TCACTTTCTCATCTTATATTTTCTTAAATGAGAA<br>AAATTTCTGTAATG                                   | fusion-PCR for <i>adhE</i><br>A267T/E568K/R577S<br>in <i>ACS2</i> |
| vsp333_tACS2_rev             | AACAAGGCAAAATAGCGTTAACAACC                                                             | verification chr.<br>integration of <i>adhE</i>                   |
| vsp334_pACS2_fw              | TTTCCTGTGAGAAGTTTAAATCCACTAAGG                                                         | verification chr.<br>integration of <i>adhE</i>                   |
| vsp335_ACS1_rev              | GGTGCGGCAAATGGCCCG                                                                     | test-PCR within gene<br>(A6) for <i>ACS1</i>                      |
| vsp336_ACS1_fw               | GGGCGTTCGAAGGGCG                                                                       | test-PCR within gene<br>(A5) for <i>ACS1</i>                      |
| vsp337_ACS2_rev              | GGCAGGTACAACCTCTGGGTTGGCC                                                              | test-PCR within gene<br>(A6) for <i>ACS2</i>                      |
| vsp338_ACS2_fw               | TTGGCTGTGGCTCGTATTGGTGC                                                                | test-PCR within gene<br>(A5) for <i>ACS2</i>                      |
| vsp339_SFA1_rev              | CACCAGCGGCAGCCACACC                                                                    | test-PCR within <i>SFA1</i>                                       |
| vsp340_SFA1_fw               | GGGCCACGAAGGAGCCGG                                                                     | test-PCR within <i>SFA1</i>                                       |
| vsp368_CC-ACS1_fw            | CCAAGACGTGTCTCACGCTGTTTTAGAGCTAGAAA<br>TAGCAAGTTAAAATAAGG                              | CrisprCas for <i>ACS1</i><br>deletion                             |
| vsp368_CC-ACS1_rev           | AGGCGTGAGACACGTCTTGGGATCATTATCTTTCA<br>CTGCGGAG                                        | CrisprCas for <i>ACS1</i><br>deletion                             |
| vsp370_CC-ACS1-Donor         | TCCTCCCAGAAAAACAATCTGTTTATTACCCGACAT<br>TCTTCACTTTATGGGCAGTCTTGATCGACTTGCTC<br>ATTATAA | CrisprCas for <i>ACS1</i><br>deletion                             |
| vsp371_pFMS1_ovtHis3_rev     | ATTTTTATAGGTTAATGTCATGCTTATATACAATATA<br>ATAATATGTAGGTTAAACGTG                         | fusion-PCR for pADH1-<br><i>FMS1</i>                              |
| vsp372_pFMS1_fw              | AATAGAAATAAGTTTGAGCAGTTCAAG                                                            | fusion-PCR for pADH1-<br><i>FMS1</i>                              |
| vsp373_tHis3_ovtADH1_rev     | CCCCCTTCTACTAGCATTGGACTTAATGAGCTGA<br>TTTAAACAAAAATTTAACGC                             | fusion-PCR for pADH1-<br><i>FMS1</i>                              |
| vsp374_pHis3_ovpFMS1_fw      | ACCTACATATTATTATTTGATATAAGCATGACATT<br>AACCTATAAAAAATAGGCG                             | fusion-PCR for pADH1-<br><i>FMS1</i>                              |
| vsp375_pADH1_ovFMS1_rev      | TTTGCTGGTGAAACTGTATTATTGATATGAGAT<br>AGTTGATTGTATGC                                    | fusion-PCR for pADH1-<br><i>FMS1</i>                              |
| vsp376_pADH1_ovtHis3_fw      | AAATTTTTGTTAAATCAGCTCATTAAGTCCAATGCT<br>AGTAGAGAAGG                                    | fusion-PCR for pADH1-<br><i>FMS1</i>                              |
| vsp377_FMS1_rev              | CTAAGTGTTGATGGAATTCTAACTCTG                                                            | fusion-PCR for pADH1-<br><i>FMS1</i>                              |
| vsp378_FMS1_ovpADH1_fw       | GCATACAATCAACTATCTCATATACAATGAATACAG<br>TTTACCAGCC                                     | fusion-PCR for pADH1-<br><i>FMS1</i>                              |
| vsp379_FMS1_rev              | GGCCTCATTCCGTCGATGACATCC                                                               | verification fusion-PCR<br>for pADH1- <i>FMS1</i>                 |
| vsp380_pFMS1_fw              | CTGCACGCAGGGATTGCCG                                                                    | verification fusion-PCR<br>for pADH1- <i>FMS1</i>                 |
| vsp388_CC-ALD6_fw            | AAAACCTTTGGCCTTAGCCCGTTTTAGAGCTAGAAA<br>TAGCAAGTTAAAATAAGG                             | CrisprCas for deletion<br>of <i>ALD6</i>                          |
| vsp389_CC-ALD6_rev           | CGGGCTAAGGCCAAAGTTTTGATCATTATCTTTCA<br>CTGCGGAG                                        | CrisprCas for deletion<br>of <i>ALD6</i>                          |
| vsp390_CC-ALD6-Donor         | AACATCTTTAACATACACAAACACTACTATCAGAA<br>TACATGTACCAACCTGCATTTCTTCCGTCATATACA<br>CAAATA  | CrisprCas for deletion<br>of <i>ALD6</i>                          |

|                          |                                                                          |                                           |
|--------------------------|--------------------------------------------------------------------------|-------------------------------------------|
| vsp391_tALD6_rev         | GCGAAATGGCAGTACTCGGGGG                                                   | verification <i>ALD6</i> -deletion        |
| vsp392_pALD6_fw          | TCGTAATAAATTCGGGGTGAGGGGG                                                | verification <i>ALD6</i> -deletion        |
| vsp393_ALD6_rev          | TACCGGCCTTCAACATCTTGGCC                                                  | test-PCR within gene (A5) for <i>ALD6</i> |
| vsp394_ALD6_fw           | TCCACGACACTGAATGGGCTACCC                                                 | test-PCR within gene (A6) for <i>ALD6</i> |
| vsp398_ERG10_ovpHXT7_fw  | AAACACAAAAACAAAAAGTTTTTTAATTTAATCA<br>AAAAATGTCTCAAACGTTTACATTG          | bottleneck-analysis                       |
| vsp399_ERG10_ovtFBA1_rev | AATACTCATTAAAAAACTATATCAATTAATTTGAATT<br>AACTTAAATCTTTCAATGACAATAGAGG    | bottleneck-analysis                       |
| vsp400_hbd_ovpHXT7_fw    | AAACACAAAAACAAAAAGTTTTTTAATTTAATCA<br>AAAAATGAAGAAGGTTTGTATTGG           | bottleneck-analysis                       |
| vsp401_hbd_ovtFBA1_rev   | AATACTCATTAAAAAACTATATCAATTAATTTGAATT<br>AACTTACTTAGAGTAATCGTAGAAACCC    | bottleneck-analysis                       |
| vsp402_crt_ovpHXT7_fw    | AAACACAAAAACAAAAAGTTTTTTAATTTAATCA<br>AAAAATGGAATTGAACAACGTCATC          | bottleneck-analysis                       |
| vsp403_crt_ovtFBA1_rev   | AATACTCATTAAAAAACTATATCAATTAATTTGAATT<br>AACTTATCTGTTCTTGAACCTTCAATC     | bottleneck-analysis                       |
| vsp404_tdTer_ovpHXT7_fw  | AAACACAAAAACAAAAAGTTTTTTAATTTAATCA<br>AAAAATGATTGTTAAGCCAATGGTTAGAAACAAC | bottleneck-analysis                       |
| vsp405_tdTer_ovtFBA1_rev | AATACTCATTAAAAAACTATATCAATTAATTTGAATT<br>AACTTAAATCTGTGCAATCTTCAACTTCAGC | bottleneck-analysis                       |
| vsp406_adhE2_ovpHXT7_fw  | AAACACAAAAACAAAAAGTTTTTTAATTTAATCA<br>AAAAATGAAGGTTACCAACCAAAAG          | bottleneck-analysis                       |
| vsp407_adhE2_ovtFBA1_rev | AATACTCATTAAAAAACTATATCAATTAATTTGAATT<br>AACTTAGAAAGACTTAATGTAGATATCCTTC | bottleneck-analysis                       |
| vsp408_eutE_ovpHXT7_fw   | AAACACAAAAACAAAAAGTTTTTTAATTTAATCA<br>AAAAATGAACCAACAAGATTTGAACAAGTTG    | bottleneck-analysis                       |
| vsp409_eutE_ovtFBA1_rev  | AATACTCATTAAAAAACTATATCAATTAATTTGAATT<br>AACTTAAACAATTCTGAAAGCATCGACC    | bottleneck-analysis                       |

**Table S2: Yeast promoters and terminators used for the expression of n-butanol pathway genes and endogenous pantothenate synthesis in this study.** DNA sequences were amplified from chromosomal DNA of CEN.PK2-1C. When not otherwise indicated, promoters were taken from 1-500 bps before and terminators 1-300 bps behind the respective open reading frames. Either all fragments were integrated into the chromosome via an integration cassette or introduced via vectors (in case of *ScALD2* and *ScPAN6*), except for *FMS1*, whose promoter was exchanged in the genome. Genes from *Saccharomyces cerevisiae* (Sc), *Clostridium acetobutylicum* (Ca), *E.coli* (Ec), *Treponema denticola* (Td) are indicated by prefixes in superscript.

| promoter         | gene                                                   | terminator     |
|------------------|--------------------------------------------------------|----------------|
| <i>pHXT7*</i>    | <sup>Sc</sup> <i>ERG10</i>                             | <i>tVMA16</i>  |
| <i>pPGK1</i>     | <sup>Ca</sup> <i>hbd</i>                               | <i>tEFM1</i>   |
| <i>pTPI1</i>     | <sup>Ca</sup> <i>crt</i>                               | <i>tYHI9</i>   |
| <i>pPYK1</i>     | <sup>Td</sup> <i>ter</i>                               | <i>tIDP1</i>   |
| <i>pADH1**</i>   | <sup>Ca</sup> <i>adhE2</i>                             | <i>tRPL3</i>   |
| <i>pTDH3</i>     | <sup>Ec</sup> <i>eutE</i>                              | <i>tRPL41B</i> |
| <i>pPFK1</i>     | <sup>Ec</sup> <i>adhE</i> <sup>A267T/E568K/R577S</sup> | <i>tDIT1</i>   |
| <i>pPMA1***</i>  | <sup>Ec</sup> <i>coaA</i>                              | <i>tVMA2</i>   |
| <i>pADH1**</i>   | <sup>Sc</sup> <i>FMS1</i>                              | <i>tFMS1</i>   |
| <i>pFBA1</i>     | <sup>Sc</sup> <i>ALD2</i>                              | <i>tPRC1</i>   |
| <i>pGPM1****</i> | <sup>Sc</sup> <i>PAN6</i>                              | <i>tNAT5</i>   |

\* (-1 to -389 bp; [3])

\*\* (-1 to -800 bp; [4])

\*\*\* (-1 to -575 bp, -700 to -925 bp; [5])

\*\*\*\* (-1 to -395 bp; [6])

**Table S3: Statistical analysis of n-butanol production**

A t-test was performed (unpaired, two-tailed, confidence: 95%) with program GraphPad Prism 5. n-Butanol titers of strains without or with additional adhE triple mutant (pVS4ev and VSY13 with genomic integration of *adhE*<sup>A267T/E568K/R577S</sup>) of table 2 were compared (strain 1 with strain 2).

| Strain 1 | Strain 2       | p-value of titer |
|----------|----------------|------------------|
| VSY10    | VSY13          | 0.24             |
| VSY15    | VSY15 + pVS4ev | 0.27             |
| VSY19    | VSY19 + pVS4ev | 0.57             |

**References**

1. Schadoweg V, Boles E. n-Butanol production in *Saccharomyces cerevisiae* is limited by the availability of coenzyme A and cytosolic acetyl-CoA. *Biotechnol Biofuels*. 2016;9:44.
2. Membrillo-Hernandez J, Echave P, Cabisco E, Tamarit J, Ros J, Lin ECC. Evolution of the *adhE* gene product of *Escherichia coli* from a functional reductase to a dehydrogenase. Genetic and biochemical studies of the mutant proteins. *J Biol Chem*. 2000;275:33869–33875.
3. Becker J, Boles E. A modified *Saccharomyces cerevisiae* strain that consumes L-arabinose and produces ethanol. *Appl Environ Microbiol*. 2003;69:4144–4150.
4. Tornow J, Santangelo GM. Efficient expression of the *Saccharomyces cerevisiae* glycolytic gene *ADH1* is dependent upon a cis -acting regulatory element (UASRPG) found initially in genes encoding ribosomal proteins. *Gene*. 1990;90:79–85.
5. Capieaux E, Vignais ML, Sentenac A, Goffeau A. The yeast H<sup>+</sup>-ATPase gene is controlled by the promoter binding factor TUF. *J Biol Chem* 1989;264:7437-7446.
6. Rodicio R, Heinisch JJ, Hollenberg CP. Transcriptional control of yeast phosphoglycerate mutase-encoding gene. *Gene*. 1993;125:125–133.
